# Supplementary material
Source: publisher figshare collection journal article supplement (https://sage.figshare.com/ndownloader/files/21301119)
Supplement: Supplementary file 1 [file 21301119]

## Sheet: Sheet1
ID	LH surge present	Textbook	Daily E2 levels centred around positive result of LH test or day -14															E2 Average	E2 MIN	E2 MAX	E2 Range	Daily P levels for the last 14 days of the cycle														P Average	P MIN	P MAX	P Range
			-7	-6	-5	-4	-3	-2	-1	0	1	2	3	4	5	6	7					-14	-13	-12	-11	-10	-9	-8	-7	-6	-5	-4	-3	-2	-1
1	0	0	5.5975	4.774	4.1344	5.4241	5.192	5.7171	3.6516	4.0776	6.797	6.5333	7.3341	7.8853	6.3362	6.1112	7.3478	5.79421	3.6516	7.8853	4.2337	67.2343	90.4202	74.3604	60.3393	107.852	95.1938	107.693	160.213	123.086		219.872	168.571		185.703	121.712	60.3393	219.872	159.533
2	0	0	4.2824	2.2534	7.607	1.1497	3.058	4.0582	14.577	10.5928	2.8045	5.3938	6.3804	7.4369	5.3068	8.3608	11.4148	6.31177	1.1497	14.577	13.4273	206.792	183.716	77.1538	141.699	184.309	317.688	314.045	423.592	345.821	299.479	169.27	261.887	105.915	105.105	224.034	77.1538	423.592	346.438
3	1	1	3.91681	4.89059	4.86216	4.79299	3.41822	3.97759	5.78023	4.52943	4.15159	3.67935	3.40037	3.00231	2.86411	4.6692	5.4788	4.22758	2.86411	5.78023	2.91611	64.2209	104.003	155.509	169.917	169.819	115.828	149.791	138.432	222.159	163.405	226.797	129.536	95.2978	66.6824	140.814	64.2209	226.797	162.576
4	1	0	7.56741	4.36041	11.6124	6.68385	7.06162	7.5521	8.34249	6.90336	8.34111	9.84382	7.21406	8.70018	8.88432	8.20957	6.81819	7.87299	4.36041	11.6124	7.25194	229.15	198.491	245.253	186.523	171.571	184.143	211.058	217.402	73.8561	72.1011	63.7172	54.0788	53.5721	45.1182	143.288	45.1182	245.253	200.135
5	1	0	4.72363	6.18295	11.8132	10.7525	7.80649	13.3355	9.04066	11.8316	9.03478	8.43391	9.42534	6.20155	2.98006	4.51379	3.74974	7.98838	2.98006	13.3355	10.3554	90.8815	58.8816	76.6326	124.101	155.234	170.677	184.957	230.27	228.078	175.733	201.492	190.124	157.228	171.871	158.297	58.8816	230.27	171.388
6	0	0	6.2415	5.119	18.7109	8.4886	11.176	10.8951	7.7602	7.0725	7.525	6.2689	8.4605	5.9852	5.198	6.2765	6.2841	8.09747	5.119	18.7109	13.5919	75.97	96.75	103.54	146.4	215.22	158.1	158.4	110.44	184.15	126.11	125.79	69.141			130.829	69.141	215.22	146.079
7	1	0	6.53444	14.3789	3.90739		6.97495	12.6292	5.95246	15.2669						7.70109	10.9994	9.37164	3.90739	15.2669	11.3595
8	0	0	3.892	4.907	5.738	4.648	6.162	5.972	5.357	4.742	4.617	5.685	5.855	6.101	6.771	5.441	5.05	5.39587	3.892	6.771	2.879	33.4565	30.9185	51.6714	74.6572	88.3753	115.299	158.404	161.093	163.118	120.132	67.4787	55.0013	41.2854	30.4444	85.0953	30.4444	163.118	132.674
9	1	1	7.7582		8.0595	6.0701	5.6311	7.7296	14.9137	10.6308	7.561	11.2405	9.6995			5.6026	7.3416	8.51985	5.6026	14.9137	9.3111	74.1341	138.265	217.935	351.994	358.909	130.248	270.734	242.566		178.258	118.995	110.385	71.5903	118.553	183.274	71.5903	358.909	287.319
10	1	0	12.7446	12.9443	9.4864	10.2107	13.6951	9.85172	6.84531	6.05719	7.7908	8.88432	7.43807	6.76655	5.49979	4.72273	6.77006	8.64717	4.72273	13.6951	8.97236	61.0846	53.8673	48.6294	167.69	202.988	202.143	215.648	231.829	166.553	175.496	170.644	156.397	92.1741	41.7413	141.92	41.7413	231.829	190.087
11	0	0	6.65954	5.68115	6.04215	14.9792	10.1216	20.2797	18.3677	7.98202	12.8332	8.26281		10.9648	7.23499	9.99307	8.73733	10.5814	5.68115	20.2797	14.5985	66.4077	108.837	125.558		261.73	151.309	196.5	244.521	160.495	148.228	140.555	104.805	92.2756	90.3402	145.505	66.4077	261.73	195.322
12	0	0	9.33889	12.7839	8.71731		10.6881	9.00247	10.1329	22.9584	19.6777	9.99786	7.16378	7.76992	9.65133	9.50478	10.5838	11.2837	7.16378	22.9584	15.7947	54.6169	59.4049	65.7962	179.705	113.176	137.435	240.535	133.884	133.021	139.742	147.495	50.0957	40.182	114.699	114.985	40.182	240.535	200.353
13	1	1	15.6324	13.0682	13.3457	16.1288	14.0825	10.5872	11.7234	13.1487	14.1061							13.5359	10.5872	16.1288	5.54164	51.302	63.341	68.842	80.012	73.752	65.652	54.164	66.005	61.728	147.495	50.096	40.182	114.699	61.0881	71.3113	40.182	147.495	107.313
14	0	0	8.599	12.038	9.039	11.158	10.617	10.742	9.169	7.806	11.032	10.529	11.263	14.149	11.443	14.543	11.484	10.9074	7.806	14.543	6.737	170.412	276.012	208.678	135.841	164.427	88.277	149.614	196.537	174.584	109.205	128.146	64.997		86.597	150.256	64.997	276.012	211.015
15	1	0	13.0822	6.29515	7.22514	4.77942	5.61072	14.0397	16.2454	12.4376	11.8611	12.3246	16.9281	9.21118	14.6496	12.5825	7.90113	11.0116	4.77942	16.9281	12.1486	45.561	84.576	141.316	232.264	228.42	230.572	153.866	112.939	114.699	298.194	87.61	106.038	101.06	69.439	143.325	45.561	298.194	252.633
16	1	0	6.11116	5.8428	5.51181	6.08629	6.49805	0.864429	5.83233	11.048	6.52988	4.72722	14.104	10.1636	4.36041	4.54074	2.18421	6.29366	0.864429	14.104	13.2395	110.107	63.953	95.1314	78.9162	74.9898	151.189	144.307	151.428	119.785	154.412	117.671	101.844	116.844	138.265	115.632	63.953	154.412	90.4587
17	1	0	27.8415	15.3616	20.8621	18.0485	12.4299	14.4972	24.525	31.1748		40.3661	28.2893	25.2027	17.5714	21.4037	21.0288	22.7573	12.4299	40.3661	27.9362		368.209	292.939	322.006	264.371	328.75	344.322	317.273	278.172	279.258	278.327	380.927	380.079	405.48	326.162	264.371	405.48	141.11
18	1	1	1.46555	3.28429	2.81931	6.26456	3.83074	3.45803	4.7631	5.63102	3.57158	2.9354	4.76416	7.04614	5.57168	5.30679	1.17292	4.12568	1.17292	7.04614	5.87322	507.371	410.053	323.932	305.439	220.36	263.974	427.808	285.441	119.38	355.99	380.602	162.173	111.338	161.493	288.24	111.338	507.371	396.033
19	0	0	12.745	12.944	9.486	10.211	13.695	9.852	6.845	6.057	7.791	8.884	7.438	6.767	5.5	4.723	6.77	8.6472	4.723	13.695	8.972	191.107	179.913	156.09	154.868	125.173	131.869			13.846	11.2	14.472	20.738	17.975	25.674	86.9103	11.2	191.107	179.907
20	1	0	5.67807	6.91049	6.27856	7.03505	7.39786	7.02661	7.52919	10.1038	8.2505	11.1369	8.39919	9.60794	9.08489	7.78819	6.9355	7.94418	5.67807	11.1369	5.45882	56.8473	76.5436	78.6259	91.3445	139.77	131.575	135.241	98.0943	89.3241	74.0819	91.8699	75.8169	55.2442	34.86	87.8027	34.86	139.77	104.91
21	1	1	2.1544	4.1951	4.864	4.5216	6.0464	6.5996	8.0234	3.2171	5.7089	6.1513	6.2103	5.1901	5.5813	4.3562	6.344	5.27758	2.1544	8.0234	5.869	209.073	155.203	160.872	183.931	249.034	209.311	269.08	99.9778	157.074	213.503	159.213	64.3157	138.293	96.5099	168.956	64.3157	269.08	204.764
22	1	1	2.0815	2.3882	3.1938	3.0313	3.462	3.708	4.747	10.2172	7.6032	4.6258	4.7812	5.1185	4.9404	3.6232	5.2489	4.58468	2.0815	10.2172	8.1357	100.15	111.411	127.834	182.455	269.831	276.063	168.146	185.916	325.903	242.566	117.281	113.532	165.971	80.9509	176.286	80.9509	325.903	244.952
23	1	1	5.188	7.165	9.107	6.753	7.532	6.998	9.457	15.753	9.477	10.194	7.648	8.387	9.069	9.681	7.908	8.6878	5.188	15.753	10.565	58.8965	80.5078	92.2147	111.224	103.405	90.7409	90.5604	105.431		104.225	102.041	56.6144	42.7476	37.3364	82.765	37.3364	111.224	73.8874
24	1	1	10.3398	11.513	11.5581	11.4448	6.52078	8.57537	9.50171	15.3825	21.5016	13.7496	17.1879	8.72159	11.0985	7.27328	10.7814	11.6767	6.52078	21.5016	14.9808	99.1612	72.3744	79.3531	114.031	171.804	184.815	204.456	300.857	164.139	158.435	151.727	154.624	88.2769	115.419	147.105	72.3744	300.857	228.482
25	1	0	15.369	13.467	12.666	10.449	13.825	12.873	16.064	25.556	12.503	13.098	12.976	17.211	17.514	8.818	6.115	13.9003	6.115	25.556	19.441	53.0685	59.4049	46.6217	59.7354	43.5581	99.0755	118.675	106.648	200.614	105.656	71.0145	70.9977	63.9687	44.7533	81.6994	43.5581	200.614	157.056
26	1	0	7.058	7.953	8.699	8.186		7.379	9.542	7.449	5.959	9.67	9.599	16.375	16.136	14.777	13.737	10.1799	5.959	16.375	10.416	136.252	148.905	187.131	218.552	270.583	163.086	158.653	127.002	255.807	107.51	110.478	125.892	113.034	144.94	161.987	107.51	270.583	163.073
27	1	1	8.182	7.843	7.678	7.546	7.824	7.405	9.45	9.913	15.38	12.315	12.451	9.008	9.002	8.381	9.026	9.42693	7.405	15.38	7.975	61.9129	66.8769	51.6989	69.7055	107.215	171.24	212.899	282.802	180.884	125.789	121.252	112.798	90.8413	107.624	125.967	51.6989	282.802	231.103
28	1	0	5.1365	3.6908	4.5557	5.476	3.8715	4.6111	1.8622	4.2568	6.1131	4.7621	3.7682	5.2541	2.3921	3.6899	4.2098	4.24333	1.8622	6.1131	4.2509	105.744	120.558	142.371	138.472	106.3	124.091	149.698	118.026	291.056	155.57	277.462	143.644	153.295	153.786	155.719	105.744	291.056	185.312
29	1	0	3.1179	4.4682	3.9831	2.9554	7.2073	3.6709	4.202	3.8874	2.7688	3.7829	6.0824	4.4128	4.917	2.4339	2.4426	4.02217	2.4339	7.2073	4.7734	201.716	175.748	167.751	263.89	281.116	275.282	270.88	169.505	262.678	300.371	240.697	215.477	142.656	127.594	221.097	127.594	300.371	172.777
30	0	0	9.21	14.887	22.189	27.265	17.373	18.37	21.635	13.794	12.982	11.64	10.929	14.074	21.2	25.736	25.085	17.7579	9.21	27.265	18.055	70.4083	90.5404	85.958	121.277	204.456	309.558	454.429	382.131	396.379	217.607	165.165	141.401	390.673	270.282	235.733	70.4083	454.429	384.02
31	1	1	10.25	16.223	15.191	15.576	13.11	10.86	11.839	8.029	8.982	7.193	9.609	8.838	11.246	7.423	6.908	10.7518	6.908	16.223	9.315	58.2131	68.6602	64.2999	139.798	104.048	159.462	169.522	125.583	136.526	125.918	174.752	80.6184	69.4058	55.6746	109.463	55.6746	174.752	119.078
32	1	0	4.7631	3.2945	2.2737	2.7858	3.5282	1.7432	3.5751	4.317	4.5957	4.3877	1.7817	3.1801	5.4817	2.3899	3.2868	3.42561	1.7432	5.4817	3.7385	205.258	128.51	111.912	178.903	242.756	245.419	268.065	158.959	223.799	172.724	170.092	83.3897	72.0685	105.68	169.11	72.0685	268.065	195.996
33	1	0	4.089	5.2547	5.206	14.7198	17.507	17.8318	17.3447	12.6802	9.7196	9.7402	5.6575	4.265	3.2355	1.2998	4.9088	8.89731	1.2998	17.8318	16.532	47.8119	81.4122	43.0532	43.6275	84.9282	80.6793	93.8645	91.6377		98.1946		62.9873	52.301	35.8417	68.0283	35.8417	98.1946	62.3529
34	1	1	2.082	2.635	2.012	3.634	3.802	3.253	7.363	3.065	2.853	1.888	1.934	4.81	1.526	4.789	1.232	3.1252	1.232	7.363	6.131	13.8294	30.178	37.6366	55.9477	25.1702	113.384	49.6731	33.7121	77.0497	46.1806	21.8185	13.2949	9.90328	9.54061	38.3799	9.54061	113.384	103.844
35	1	0	3.51189	22.2094	18.7831		0.3012	5.45567	0.947883	0.636061	2.14194	12.1127	30.7023	26.832	9.90494	3.34012	5.64227	10.1801	0.3012	30.7023	30.4011	83.0989	69.9107	75.8671	60.4088	150.78	205.183	346.03	222.851	62.1246	60.4411	52.8361	298.614	22.8162	91.9171	128.777	22.8162	346.03	323.213
36	1	0	17.2916	2.67552	6.03861	14.2844	7.28026	8.9917	6.27612	8.38536	5.03209	5.43624	5.38657	3.35457	8.44224	5.66703	10.9254	7.69785	2.67552	17.2916	14.6161	46.7665	62.4773	88.278	120.174	119.263	118.636	152.722	88.3316	212.515	119.753		84.4386	119.053	65.127	107.503	46.7665	212.515	165.749
37	1	0	1.2747	0.9288	0.1496	2.9615	0.6886	1.9534	4.9465	4.9036	12.7274	13.1119	8.4979	8.2677	6.3392	5.7289	4.0855	5.10435	0.1496	13.1119	12.9623	33.9693	42.4275	47.3947	56.4193	40.8966	62.0284	88.0353	107.539	95.3597	94.672	147.753	146.477	110.389	61.5235	81.0631	33.9693	147.753	113.783
38	1	0	13.8133	20.6499	11.9089	21.3344	16.8949	18.4263	21.7363	12.9677	7.91625	22.4853	22.0247	11.5476	15.1832	13.9668	12.9727	16.2552	7.91625	22.4853	14.569	195.14	207.25	167.321	258.427	379.632	279.477	300.032	101.869	295.466	145.722	137.133	126.24	326.426	296.481	229.758	101.869	379.632	277.763
39	1	0	6.128	10.162	7.547	8.157	12.258	10.164	9.058	9.194	10.863	7.08		7.235	7.518	7.69	3.563	8.32979	3.563	12.258	8.695	18.005	18.452		31.728	38.712	45.779	23.195		22.755	46.939	27.298	14.728	4.874	12.035	25.3751	4.874	46.939	42.065
40	1	0	2.2878		3.9918	3.3895	4.8686	5.3184	5.9645	8.931	11.2689	1.3807	8.3293	6.0668	17.3601	7.0915	10.0202	6.87636	1.3807	17.3601	15.9794	57.444	47.73	102.044	88.136	247.093	150.142	154.577	235.392	143.489	359.248	256.274	88.632	180.096	57.444	154.839	47.73	359.248	311.518
41	1	1	5.68	2.68	3.594	1.705	2.869	7.255	4.63	7.616	2.939	3.307	2.079	3.571	3.61	2.648	3.507	3.846	1.705	7.616	5.911	50.9001	48.9903	133.911	80.8968	90.8622	149.532	129.039	104.565	180.623	130.798	61.9287	34.9053	37.9922		94.9957	34.9053	180.623	145.718
42	1	1	24.9879		12.712	7.5521	4.2244	6.7789	17.3763	14.359	8.9549	14.414	4.8101	6.0102	3.3798	4.1048	16.8638	10.4663	3.3798	24.9879	21.6081	124.538	168.728	193.029	175.63	131.595	60.8304	62.2441	54.1803	31.0757	63.4459	94.0355	84.1794	51.8163	37.7726	95.2215	31.0757	193.029	161.953
43	0	0	5.963	3.098	2.245	1.785	2.478	1.695	2.089	1.031		9.129		7.102			7.421	4.00327	1.031	9.129	8.098	0.2502		4.6024		2.19169			15.2778	49.0907	73.1297	68.586	123.867		152.571	54.3962	0.2502	152.571	152.321
44	0	0	3.0047	1.4136	3.2831	3.0152	2.8111	4.4042	4.3733	3.7301	3.0398	2.769	3.3604	3.7465	4.2508	4.863	5.029	3.53959	1.4136	5.029	3.6154	28.37	35.721	31.638	42.195	33.308	45.766	45.261	25.048	31.564	54.105	81.106	69.982	150.644	120.825	56.8239	25.048	150.644	125.596
45	1	0	2.924	4.171		4.073	4.693	3.845	4.061	1.445	4.585		4.43	5.939	9.8	4.22	4.195	4.49085	1.445	9.8	8.355	49.4135	31.6378		16.8454	30.6634	25.6115	2.33065	14.1877	55.9141	87.5274	5.39569				31.9527	2.33065	87.5274	85.1968
46	1	1	1.83296			4.5451	5.17802	5.56061		3.69536		3.04227	1.3786	2.94896	2.92959	6.0911	--	3.72026	1.3786	6.0911	4.7125		4.70213		10.1196	30.1805	54.7418	65.561						39.374	0.79039	29.3528	0.79039	65.561	64.7706
47	1	0	1.209	5.728	8.543	8.669	4.513	4.585	6.365	13.358	9.662	2.873	3.409	9.526	11.287	23.614	13.547	8.4592	1.209	23.614	22.405	77.8915	234.766	288.136	474.966	348.254	298.324	462.613	193.627	279.481	266.821	91.8657	82.039	45.1931	27.8841	226.562	27.8841	474.966	447.082
48	1	1	5.755	5.03	4.997	5.115	4.491	6.692	5.044	10.755	7.132	7.224	4.544	4.09	4.475	4.102	2.483	5.46193	2.483	10.755	8.272	35.6888	30.2544	66.9914	53.4809	64.2208	68.5169	86.9825	93.7571	94.7165	61.0347	67.0819	57.157	78.885		66.0591	30.2544	94.7165	64.4621
49	0	0	8.14427	9.7404	5.93689	15.3983	19.0413	5.08172	20.3396	8.58145	30.3015	21.381	32.0883	9.5076	13.4442	29.6971	7.32534	15.7339	5.08172	32.0883	27.0066	10.168	50.0933	24.3408	90.9366	39.4935	66.1842	124.079	43.6555	69.3106	98.6512	95.0225	70.0272	74.9535	52.2169	64.938	10.168	124.079	113.911
50	1	0	3.9698	5.11709	6.62825	4.35461	4.30393	5.08576	5.16997	9.15672	16.0878	18.0531	16.3352	21.7777	6.40983	4.91482	3.81741	8.74547	3.81741	21.7777	17.9602	63.194	63.884	76.62	102.505	134.943	138.021	125.453	188.641	232.19	219.743	178.103	147.127	113.173	58.611	131.586	58.611	232.19	173.579
51	0	0	5.7247	1.7485	10.98	4.9823	12.8325	1.4561	12.7053	11.2544	8.7372	8.8759	6.7886		4.4837	9.9559	9.0417	7.8262	1.4561	12.8325	11.3764	72.342	56.992	55.497	100.076		63.631	92.572	178.181	364.573	346.688	408.49	347.279	395.489	284.458	212.79	55.497	408.49	352.993
52	1	0	3.0445	9.186	15.3276	10.9956	8.373	13.6035	4.5424	14.9446	13.8027	14.7612	6.3055	4.7107	4.3938	3.7393		9.1236	3.0445	15.3276	12.2831			101.473	190.688	144.492	60.5522	155.365	202.207	198.322	276.788	213.746	184.94	165.384	88.7227	165.223	60.5522	276.788	216.236
53	1	0	30.524	14.956	41.636	25.486	29.266		35.521	41.674		20.77	46.524	15.498		38.986	44.25	32.0909	14.956	46.524	31.568	126.469		138.068	281.142	192.165		290.821	220.102	242.932		61.6256			228.216	197.949	61.6256	290.821	229.196
54	0	0	24.9879		12.712	7.5521	4.2244	6.7789	17.3763	14.359	8.9549	14.414	4.8101	6.0102	3.3798	4.1048	16.8638	10.4663	3.3798	24.9879	21.6081	111.734	45.354	53.078	110.825	68.388	85.203	115.054	190.534	144.198	114.894	149.143	42.22	128.084	125.453	106.011	42.22	190.534	148.314
55	1	0	5.332	5.257	3.563	8.523	8.531	5.59	7.291	8.464		7.486	6.446	6.974	3.832		6.508	6.44592	3.563	8.531	4.968		147.924	195.142	215.305	205.201		257.9	219.474	154.971	93.026	70.1102		150.212	55.9785	170.927	55.9785	257.9	201.922
56	0	0	3.7393	3.7621	2.9934	4.1502	4.3842	6.2658	6.6181	2.1128	2.3513	3.6767	2.8434	5.0237	4.3017	5.8387	4.3962	4.16384	2.1128	6.6181	4.5053	40.3585	59.2463	97.2774	77.9776	125.157	130.11	173.718	107.654	92.8376	122.007	150.8	108.98	59.4913	58.7584	100.312	40.3585	173.718	133.359
57	0	0		0.124			1.444	5.657	3.23	3.076	2.59	4.961	7.211	3.69	10.82	3.12	3.027	4.07917	0.124	10.82	10.696	41.1004	8.78671	8.19973	4.46965	18.2144	5.66144	11.2856	93.9987	10.0008	24.7691	24.875	48.069	24.6878	3.33036	23.3892	3.33036	93.9987	90.6684
58	1	1	5.717	7.42	5.309	4.656	4.771	6.819	7.141	16.172	8.355	10.468		7.958	5.976	2.892		7.20415	2.892	16.172	13.28	73.776	49.7375	83.1974		125.832	124.486	76.5541			65.3281	76.6837	64.4461	17.07	28.9037	71.4559	17.07	125.832	108.762
59	1	1	25.2262	13.0507	5.82139	18.1379	11.8132	8.30099	5.9991	11.9305	20.9617	5.78956	18.1279	10.7692	7.58013	16.4243	12.1518	12.8056	5.78956	25.2262	19.4367	5.91746	6.10392	23.7666	43.4523	12.7636	85.1548	60.2474	54.9093	60.4411	50.5189	46.1287	54.3294	36.7034	20.2663	40.0502	5.91746	85.1548	79.2373
60	0	0	1.50668	4.15468	3.2104	15.9862	3.02201	5.31833	8.00288	7.64127	3.13241	2.81043	6.51327	3.08391	5.123	3.35145	7.85863	5.38104	1.50668	15.9862	14.4795	18.6092	11.9716	39.7822	26.5815	51.6935	30.1794	23.2711	31.0297	43.0684	16.8514	10.3024	7.02575	5.36621	5.86087	22.9709	5.36621	51.6935	46.3273
61	1	1	1.227	1.8745	2.5621	3.0388	4.4264	3.9267	3.6318	4.3782	2.7488	2.1196	2.8516	3.0807	2.4412	3.1814	1.8045	2.88622	1.227	4.4264	3.1994		17.2587	22.5496	75.4517	74.5555	75.3998	101.429	146.024	103.425	96.283	88.9792	44.851	14.8093	18.9984	67.6933	14.8093	146.024	131.215
62	1	1	3.91926	5.24305	3.83704	2.70802	2.20626	5.76526	8.25405	5.13961	5.64078	2.81265	4.95379	7.71222	9.2492	5.63034	1.73493	4.9871	1.73493	9.2492	7.51428	7.46868	7.43524	5.48612	14.4846	23.5932	22.7702	14.7682	30.3662	15.8615	21.2362	23.4129	40.7104	6.10062	7.02304	17.1941	5.48612	40.7104	35.2243
63	0	0	12.4944	6.82683	9.68957	5.54798	7.76575	20.4114	8.17342	3.84535	0.78543	12.6494	8.13258	10.2708	8.71695	5.56386		8.63384	0.78543	20.4114	19.6259	40.1567	156.552	179.057	298.85	229.486	107.002		166.591	126.198	117.896	132.429	33.369	15.6152	23.0663	133.6	15.6152	298.85	283.235
64	1	0	1.397	1.262	0.573	0.994	2.971	2.501	1.825	3.687	2.516	3.193	12.141	2.169	2.306	1.724	1.408	2.71113	0.573	12.141	11.568	38.1828	49.4394	60.7163	51.7026		70.3868	52.7638	54.5667	51.8735	41.565	39.4769	19.0348	5.17494	10.2835	41.9359	5.17494	70.3868	65.2118
65	1	1	4.2654	1.2948	6.1931	5.1929	7.2568	9.7317	5.226	22.8718	20.8856	6.8856	7.8083	9.4476	11.5957	4.0137	9.14	8.78727	1.2948	22.8718	21.577	95.174	200.869	101.779	177.753	234.537	163.504	120.631	84.325	70.181	117.829	135.371	135.738	135.615	128.991	135.878	70.181	234.537	164.356
66	1	0	4.416	3.88	2.043	1.243	0.772	2.521	3.845	3.546	3.314	2.944	2.812	1.149	0.182	0.036	3.106	2.38727	0.036	4.416	4.38	18.7653	15.9756	31.7962	29.369	61.7618	56.6335	44.1504	38.0485	47.1371	99.1279	19.3137	48.4458	9.19472	17.5719	38.378	9.19472	99.1279	89.9332
67	1	1	4.716	1.753	3.881	4.166	1.633	2.674	2.956	6.761	10.373	2.015	4.9	4.632	10.343	5.126	3.719	4.6432	1.633	10.373	8.74	77.8772	62.8859	73.4845	98.8124	140.279	148.209	111.297	104.476	66.6542	113.281	56.7567	58.8355	37.9886	66.1705	86.9291	37.9886	148.209	110.22
68	1	1	0.719	1.394	0.522	1.213	2.001	3.42	3.928	2.361	2.338	1.263	0.635	0.867	3.163	1.536	4.541	1.9934	0.522	4.541	4.019	16.7268	21.0905	21.2216	39.3162	35.7026	28.2615	53.301	50.7147	17.1017	35.6707	51.0798	16.8948	9.13994	5.72483	28.7105	5.72483	53.301	47.5762
69	1	0	21.506	12.724	19.396	6.912	6.584	16.012	7.669	5.368	8.564	8.748	8.898	8.256	9.416	6.402	6.309	10.1843	5.368	21.506	16.138	116.877	121.958	86.6818	105.814	100.073	145.842	65.0229	82.5708	65.1604	48.9066	69.4193	47.4816	28.7569	23.1791	79.1245	23.1791	145.842	122.662
70	1	0	1.555	0.742	0.844	1.135	1.884	8.655	1.991	1.122	0.709	0.907		1.857	2.085	1.431	4.585	2.10729	0.709	8.655	7.946	28.3686	22.0425	79.8958		122.47	135.996	77.668	116.749	100.956	69.569	121.471	98.2827	89.9702	104.29	89.8253	22.0425	135.996	113.953
71	1	1	1.346	4.167	5.932	6.394			13.311	31.922	12.054	8.086	3.274	9.07	6.202	8.827	13.561	9.54969	1.346	31.922	30.576	50.9248	59.4115	64.1614	134.035	162.701	223.111	273.254	183.844	147.51	121.34	138.855	104.31	31.3331	7.63887	121.602	7.63887	273.254	265.615
72	0	0	0.804	2.49		25.285	17.005	18.351	30.692	14.063	4.796	1.027	4.299	4.71	20.613	20.009	13.042	12.6561	0.804	30.692	29.888	31.453	25.1412	34.2193	92.2996	138.224	191.082	295.622	136.162	40.113	59.4477	40.0665	38.2726	27.9736	12.0598	83.0097	12.0598	295.622	283.562
73	0	0	0.736	0.855	1.32	0.831	0.677	1.947	1.441	0.78	0.714	1.087	1.377	0.741	0.965	0.701	0.893	1.00433	0.677	1.947	1.27	30.9431	23.5357	27.6803	127.506	121.542	169.489	51.9678	77.9256	88.2601	106.161	97.8139	98.0676	28.3686	35.3548	77.4725	23.5357	169.489	145.954
74	1	0	8.62401	2.86221	6.91637	0.50615	2.44073	3.22149	2.73739	2.47026	4.65702	5.2765	1.23846	1.19113	2.61224	3.40601	2.7034	3.39089	0.50615	8.62401	8.11786	3.50738	3.7358	11.3297	6.95498	1.54987	1.54612	2.40033	3.46195	47.0094	46.4973	46.393	64.364	206.225	20.7216	33.264	1.54612	206.225	204.679
75	0	0	2.635	3.643	1.323	3.151	2.824	7.573	3.694	4.626	0.1	0.542		2.36	2.321			2.89933	0.1	7.573	7.473	4.01349	3.36665	3.85528		4.2622	3.15919			97.2605	36.9412	46.0813	39.5855	56.0338	57.7848	32.0313	3.15919	97.2605	94.1013
76	1	1	3.155	3.517	3.873	4.15	6.526	7.543	6.429	6.522	6.599	4.306	3.96	3.024	3.674	3.434	2.433	4.60967	2.433	7.543	5.11	28.0562	32.1196	36.0768	41.1241	36.2165	40.7693	51.4896	45.0736	43.8876	67.1643	14.8254	15.9996	10.548	7.55079	33.6358	7.55079	67.1643	59.6135
77	1	0	7.893	4.39	6.169	6.422	11.995	30.75	6.265	5.653	22.755	9.194	16.706	21.238	4.105	8.993	27.259	12.6525	4.105	30.75	26.645	15.9275	43.7131	96.7992	13.5038	42.5066	178.618	200.131	33.9472		67.6422	39.2475	37.6699	9.12312	28.2526	62.0832	9.12312	200.131	191.008
78	1	1	3.93	2.828	2.923	4.663	5.855	19.927	23.986	16.371	3.257		5.208	8.834	6.142	9.874	7.031	8.63064	2.828	23.986	21.158	8.502	15.09	14.428	13.025		21.752	34.194	21.076	36.389	28.513	18.392	13.956	6.852	7.596	18.4435	6.852	36.389	29.537
79	0	0	7.006	5.704	0.949	3.606	1.821	0.759	4.899	3.409	2.139	3.799	2.607	2.887	1.522	0.238	1.982	2.88847	0.238	7.006	6.768	64.6118	44.0251	45.4574	57.543	59.6855	99.1527	79.7688	164.023	90.995	154.636	183.614	118.821	130.047	91.732	98.8652	44.0251	183.614	139.588
80	0	0	3.346	4.185	7.325	7.281	6.045	12.793	8.636	11.734	16.525	17.263	8.366	12.065	11.009	7.507	11.317	9.69313	3.346	17.263	13.917	38.0058	37.03	46.0352	81.0874	64.8243	92.7828	57.4313	63.8473	51.0946	25.2269	27.5665	45.7367	23.3877	29.5138	48.8265	23.3877	92.7828	69.3952
81	0	0	5.996	18.639	6.152	7.845	2.58			7.251		4.635	9.201	5.897				7.57733	2.58	18.639	16.059	16.419	41.823	37.367	108.299	105.999						156.517	78.253	35.13	20.833	66.7378	16.419	156.517	140.098
82	0	0	0.738	0.975	1.588	3.761	5.263	1.482	1.081	1.892	2.859	2.391	1.27	3.237	3.349	2.228	1.711	2.255	0.738	5.263	4.525	32.446	67.543	68.703	64.221	168.507	196.951	161.571	153.314	147.18	101.217	127.431	71.762	77.395	45.32	105.969	32.446	196.951	164.505
83	1	0	1.616	1.205	1.755	2.217	1.437	5.269	3.643	1.025	1.254	0.913	1.454	1.337	24.325	0.385	1.31	3.27633	0.385	24.325	23.94	51.588	77.107	111.691	103.202	111.407	92.858	132.789	180.77	121.495	204.973	214.828	53.519	41.28	26.598	108.865	26.598	214.828	188.23
84	1	0	18.578	15.855	13.918	3.402	4.686	4.458	16.627	14.882	15.52	12.394	5.243	7.151	15.138	8.488	7.514	10.9236	3.402	18.578	15.176	40.382	62.174	55.963	228.377	387.464	197.389	29.13	17.165	17.215	26.18	16.449	24.453	11.137	9.437	80.2084	9.437	387.464	378.027
85	1	1	6.21762	7.63748	6.99465	8.07053	8.85156	8.88716	10.2959	10.945	7.15035	9.54821	7.32781	9.36827	9.0802	6.98452	8.39907	8.38389	6.21762	10.945	4.72734	7.531	6.099	25.212	29.607	59.118	68.244	37.595	73.089	54.349	45.212	44.883	28.749	11.253	5.521	35.4617	5.521	73.089	67.568
86	1	0	11.178	19.884	14.159	9.951	10.317	12.596	14.379	10.849	13.296	11.904	14.869	11.352	19.226	26.383	21.79	14.8089	9.951	26.383	16.432	11.163	14.378	12.997	130.357	27.107	99.992	71.369	86.319	87.908	106.709	152.582	92.206	40.576		71.8202	11.163	152.582	141.419
87	1	1	7.00473	1.41322	2.32885	7.52927	6.21403	12.0197	14.6897	6.53675	1.87209	2.28634	4.424	6.17876	11.3851	9.36322	6.84102	6.67245	1.41322	14.6897	13.2765	5.049	18.847	68.814	119.227	163.944	152.927	193.154	105.253	49.89	131.044	223.002	105.29	60.651	39.356	102.603	5.049	223.002	217.953
88	1	1	2.632	2.887	3.366	2.985	5.142	2.894	4.257	4.115	2.047	2.823	3	4.062	7.031	5.684	2.609	3.70227	2.047	7.031	4.984	56.827	43.341	74.308	114.287	69.151	75.723	85.948	94.717	87.095	54.719	16.464	35.803	27.958	19.697	61.1454	16.464	114.287	97.823
89	1	0	2.075	1.257	1.487	0.898	2.153	0.802	0.778	0.701	1.246	0.778	1.733	1.261	1.386	1.595	2.748	1.3932	0.701	2.748	2.047	29.091	38.465	73.901	104.786	123.693	70.473	99.463	91.763	92.226	72.247	90.134	50.495	86.367	34.93	75.5738	29.091	123.693	94.602
90	1	0	3.85119	3.07587	3.61236	4.45443	3.56158	6.25215	5.09357	6.69236	5.74822	4.07697	5.63862	4.71247	5.90223	3.35142	4.16401	4.67916	3.07587	6.69236	3.61649	44.996	76.001	129.044	148.947	145.9	208.621	203.608	346.278	179.92	236.642	161.711	105.322	117.93	109.808	158.195	44.996	346.278	301.282
91	1	0	19.806	1.136	4.054	8.556	6.606	8.944	8.236	6.122	4.823	4.265	8.795	7.148		6.372	7.591	7.31814	1.136	19.806	18.67	51.194	78.45	99.018	151.65		158.063	130.33	170.148	125.516	108.066	159.519	96.887		160.236	124.09	51.194	170.148	118.954
92	0	0	9.944	7.957	13.368	12.52	11.411	12.355	12.571	12.807	11.038	8.381	11.169	10.309	8.706	10.534	9.628	10.8465	7.957	13.368	5.411	84.496	148.005	200.984	89.328	115.326	119.587	131.763	188.131	353.078	173.922	99.95	235.874	154.21	190.704	163.24	84.496	353.078	268.582
93	1	1	4.329	4.133	6.52	7.212	7.707	3.267	7.996	4.722	3.872	1.334	0.854	5.444	9.007		4.85	5.08907	0.854	9.007	8.153	3.249	0.147	1.052	2.369	4.125	105.566		147.673	140.644	69.43	85.31	102.834		39.782	58.5151	0.147	147.673	147.526
94	1	0	11.021	7.206	8.097	6.248	7.302	9.404	9.113	8.199	6.764	4.112	8.764	10.593	11.56	6.147	14.807	8.62247	4.112	14.807	10.695	22.047	133.239	13.609	22.902	22.38	204.476	269.672	74.492	63.847	3.799	13.977	43.664	24.311	30.507	67.3516	3.799	269.672	265.873
95	1	0	3.576	1.125	1.424	1.621	2.19	1.668	2.627	2.441	2.073	0.449	5.168	5.521	5.641	4.729	11.056	3.4206	0.449	11.056	10.607	3.267	10.955	11.229	25.759	47.844	20.586	14.948	13.945	8.034	29.539	17.863	204.725	75.748	59.549	38.8566	3.267	204.725	201.458
96	1	1	0.131	0.961	0.758	0.989	0.765	0.889	0.786	2.544	0.735	0.402	0.855	0.719	0.913	0.728	1.629	0.920267	0.131	2.544	2.413	18.317	18.86	18.213	20.147	18.401	28.108	24.01	28.157	33.378	44.383	59.083	58.137	64.027	105.451	37.0793	18.213	105.451	87.238
97	1	1	23.364	11.774	10.634	23.979	34.401	41.631	40.599	38.896	33.916	12.353	18.284	24.674	34.526	14.146	29.521	26.1799	10.634	41.631	30.997	66.785	163.078	300.123	422.708	234.006	298.13	323.087	305.885	271.488	96.347	197.264	60.664	49.282	67.615	204.033	49.282	422.708	373.426
98	0	0	2.062	0.765	3.631	8.719	6.096	8.528	11.618	6.102	4.548	1.476	1.68	3.753	3.783	5.714	3.758	4.81553	0.765	11.618	10.853	5.459	25.176	176.396	105.476	64.225	98.37	84.104	51.754	53.677	28.734	9.715	33.833	7.627	0.415	53.2115	0.415	176.396	175.981
99	1	1	1.56	2.162	3.856	4.828	7.736	9.881	11.058	5.2	2.923	3.002	4.089	4.223	6.912	4.103	4.237	5.05133	1.56	11.058	9.498	7.185	5.803	20.46	80.885	44.843	34.051	28.056	88.032	10.465	142.095	192.21	177.939	151.911	115.013	78.4962	5.803	192.21	186.407
100	1	0	19.311	21.703	16.3	25.205	17.724	8.942	24.54	21.799	8.721	35.298	29.879	7.399	7.945	16.04	25.06	19.0577	7.399	35.298	27.899	466.06	435.612	216.932	212.57	315.851	656.433	331.363	271.884	875.958	349.683	481.855		381.839		416.337	212.57	875.958	663.388
101	1	0		0.73789	1.63807	3.20998	4.04459	6.28669	4.6771	5.3398	4.14001	1.94463	1.65919	2.24428	3.01098	2.83833	4.03498	3.27189	0.73789	6.28669	5.5488	105.942	118.817	148.55	154.54	164.025	194.896	235.223	291.192	316.314	299.684	181.806	210.815	178.144	176.164	198.294	105.942	316.314	210.372
102	1	0	2.165	2.62	3.537	4.725	5.939	5.947	6.661	3.48	2.528	2.41	5.211	5.728	4.755	9.127	5.486	4.68793	2.165	9.127	6.962	111.973	175.067	251.013	204.898	211.708	239.221	339.752	227.534	242.814	257.354	199.073	150.926	135.335	181.032	209.121	111.973	339.752	227.779
